# Supplementary material for: Downsizing a heavyweight: factors and methods that revise weight estimates of the giant fossil whale Perucetus colossus
Source: PeerJ journal article supplement (doi:10.7717/peerj.16978), 2024-02-29
Supplement: Supplemental_information_R1.zip [file Supplemental_information_R1.zip]

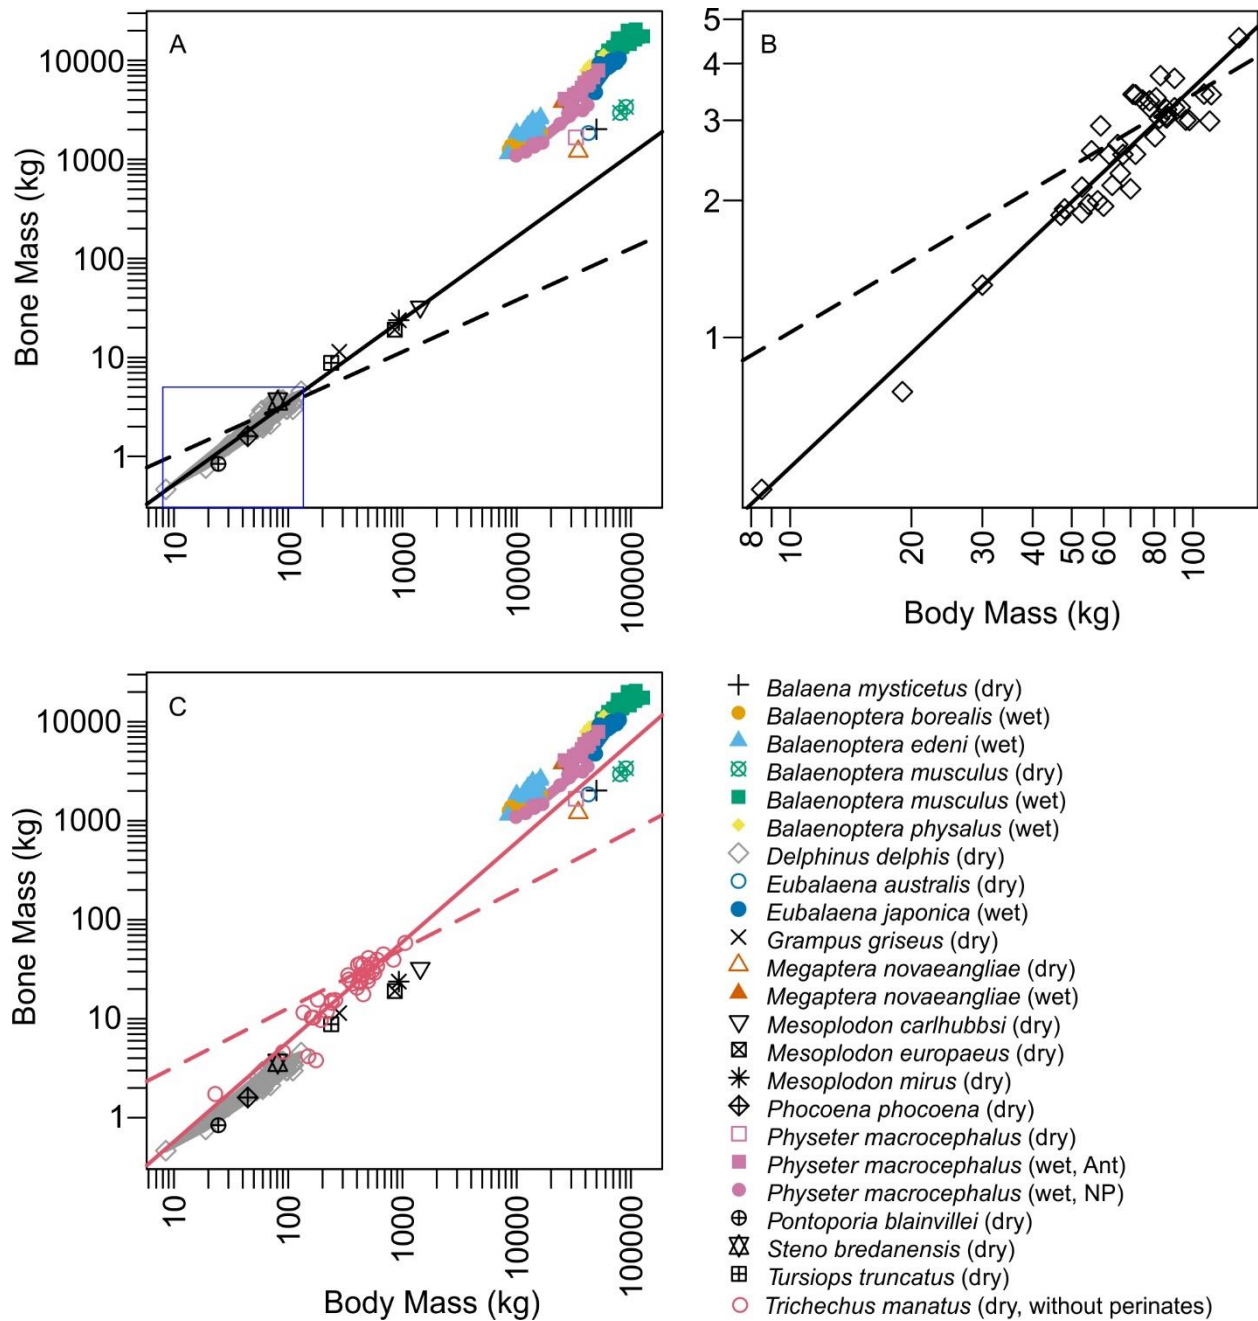

**Supplementary Figure 1.** Bias from using adult data only, based on Fig. 4. **A**, Regression lines for all data points (solid) versus adults only (dashed) for *Delphinus delphis*. **B**, same as A but zoomed in to the blue rectangle to show that adults have more scatters around the regression line than juveniles. **C**, Regression lines for all data points (solid) versus only adults 3m or larger as in Bianucci et al. (2023) (dashed) for *Trichechus* spp. Adult-based lines (dashed) vastly underestimate the intraspecific slope that is common across taxa.
